# Supplementary material for: The mutual dependence of negative emission technologies and energy systems
Source: Royal Society of Chemistry journal article supplement (doi:10.1039/c8ee03682a), 2019-01-01
Supplement: c8ee03682a1.pdf [file c8ee03682a1.pdf]

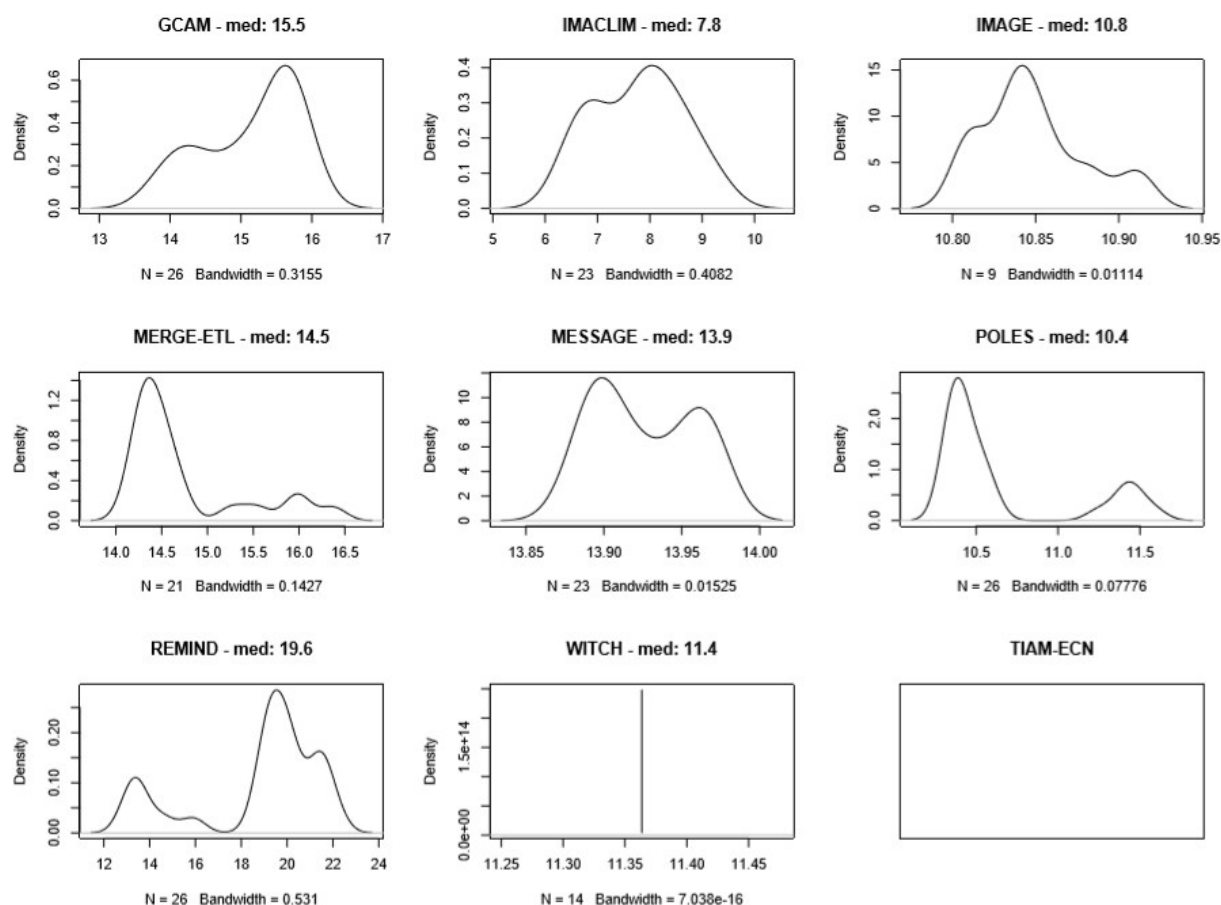

Figure S1. Distribution of primary energy biomass input per Gt CO<sub>2</sub> sequestered in BECCS within and across integrated assessment models in GJ/tCO<sub>2</sub>. Overall median value: 14 GJ/tCO<sub>2</sub>.
